# Supplementary material
Source: PubMed Central journal article supplement (PMC16685)
Supplement: pnas_97_14_8151__2.pdf [file pnas_97_14_8151__2.pdf]

**Supplementary Table 3.** Compound structures and  $K_d$  values for *IKCa1* block

| Compound                                                                            |                                                    |                                                                                       |                                                  |                     | $K_d$<br>[ $\mu\text{M}$ ]                                                           | Compound                                                                             |                                                                                     |                                                                                     |                                                  |                               | $K_d$<br>[ $\mu\text{M}$ ] |
|-------------------------------------------------------------------------------------|----------------------------------------------------|---------------------------------------------------------------------------------------|--------------------------------------------------|---------------------|--------------------------------------------------------------------------------------|--------------------------------------------------------------------------------------|-------------------------------------------------------------------------------------|-------------------------------------------------------------------------------------|--------------------------------------------------|-------------------------------|----------------------------|
| 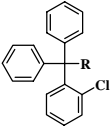   | <b>1e</b>                                          | R =  |                                                  |                     | >20                                                                                  |     | <b>R1</b>                                                                           |                                                                                     | <b>R2</b>                                        |                               |                            |
|                                                                                     | <b>1f</b>                                          | R =  |                                                  |                     | 1.7                                                                                  |                                                                                      | <b>4b</b>                                                                           | 1-pyrrolyl                                                                          | H                                                | 28                            |                            |
|    |                                                    | <b>R1</b>                                                                             | <b>R2</b>                                        | <b>R3</b>           |                                                                                      |                                                                                      | <b>4c</b>                                                                           | 1-pyrrolidinyl                                                                      | H                                                | 30                            |                            |
|                                                                                     | <b>2b</b>                                          | m-ClC <sub>6</sub> H <sub>4</sub>                                                     | C <sub>6</sub> H <sub>5</sub>                    | H                   | 0.53                                                                                 |                                                                                      | <b>4e</b>                                                                           | <i>N</i> -(1,3-thiazol-2yl)aminyl                                                   | o-F                                              | 12                            |                            |
|                                                                                     | <b>2c</b>                                          | p-ClC <sub>6</sub> H <sub>4</sub>                                                     | C <sub>6</sub> H <sub>5</sub>                    | H                   | 0.55                                                                                 |                                                                                      | <b>4f</b>                                                                           | <i>N</i> -(1,3-thiazol-2yl)aminyl                                                   | p-Cl                                             | 20                            |                            |
|                                                                                     | <b>2d</b>                                          | m-ClC <sub>6</sub> H <sub>4</sub>                                                     | m-ClC <sub>6</sub> H <sub>4</sub>                | H                   | >50                                                                                  |                                                                                      | <b>4g</b>                                                                           | <i>N</i> -(1,3-thiazol-2yl)aminyl                                                   | p-CF <sub>3</sub>                                | 35                            |                            |
|                                                                                     | <b>2e</b>                                          | p-ClC <sub>6</sub> H <sub>4</sub>                                                     | p-ClC <sub>6</sub> H <sub>4</sub>                | H                   | >50                                                                                  |                                                                                      | <b>4h</b>                                                                           | <i>N</i> -(1,3-thiazol-2yl)aminyl                                                   | o-CF <sub>3</sub>                                | 25                            |                            |
|                                                                                     | <b>2f</b>                                          | o-FC <sub>6</sub> H <sub>4</sub>                                                      | C <sub>6</sub> H <sub>5</sub>                    | H                   | 0.7                                                                                  |                                                                                      | <b>4i</b>                                                                           | <i>N</i> -(4-methyl-1,3-thiazol-2yl)aminyl                                          | o-Cl                                             | 8                             |                            |
|                                                                                     | <b>2g</b>                                          | p-FC <sub>6</sub> H <sub>4</sub>                                                      | C <sub>6</sub> H <sub>5</sub>                    | H                   | 0.7                                                                                  |                                                                                      | <b>4j</b>                                                                           |  | o-Cl                                             | 1                             |                            |
|                                                                                     | <b>2h</b>                                          | o-CF <sub>3</sub> C <sub>6</sub> H <sub>4</sub>                                       | C <sub>6</sub> H <sub>5</sub>                    | H                   | 0.7                                                                                  |                                                                                      | <b>4l</b>                                                                           | <i>N</i> -(4-pyridyl)aminyl                                                         | p-Cl                                             | 11                            |                            |
|                                                                                     | <b>2i</b>                                          | m-CF <sub>3</sub> C <sub>6</sub> H <sub>4</sub>                                       | C <sub>6</sub> H <sub>5</sub>                    | H                   | 0.6                                                                                  |                                                                                      | <b>4m</b>                                                                           | <i>N</i> -(2-pyrimidyl)aminyl                                                       | o-Cl                                             | 0.9                           |                            |
|                                                                                     | <b>2j</b>                                          | p-CF <sub>3</sub> C <sub>6</sub> H <sub>4</sub>                                       | C <sub>6</sub> H <sub>5</sub>                    | H                   | 0.8                                                                                  |                                                                                      | <b>4n</b>                                                                           | <i>N</i> -(2-pyrimidyl)aminyl                                                       | o-CF <sub>3</sub>                                | 15                            |                            |
|                                                                                     | <b>2k</b>                                          | p-CH <sub>3</sub> OC <sub>6</sub> H <sub>4</sub>                                      | p-CH <sub>3</sub> OC <sub>6</sub> H <sub>4</sub> | H                   | 10                                                                                   |                                                                                      | <b>4o</b>                                                                           | <i>N</i> -(2-pyridyl)aminyl                                                         | o-Cl                                             | 28                            |                            |
|                                                                                     | <b>2l</b>                                          | p-CH <sub>3</sub> OC <sub>6</sub> H <sub>4</sub>                                      | p-CH <sub>3</sub> OC <sub>6</sub> H <sub>4</sub> | p-CH <sub>3</sub> O | 10                                                                                   |                                                                                      | <b>4p</b>                                                                           |  | o-Cl                                             | >20                           |                            |
|                                                                                     | <b>2m</b>                                          | 2-thienyl                                                                             | C <sub>6</sub> H <sub>5</sub>                    | H                   | 1.5                                                                                  | <b>4q</b>                                                                            |  | o-Cl                                                                                | 15                                               |                               |                            |
|                                                                                     | <b>2n</b>                                          | 2-thienyl                                                                             | 2-thienyl                                        | H                   | 9                                                                                    |    | <b>R1</b>                                                                           |                                                                                     | <b>R2</b>                                        | <b>R3</b>                     | $K_d$                      |
|                                                                                     | <b>2o</b>                                          | 2-thienyl                                                                             | p-FC <sub>6</sub> H <sub>4</sub>                 | H                   | 0.8                                                                                  |                                                                                      | <b>5e</b>                                                                           | p-CH <sub>3</sub> OC <sub>6</sub> H <sub>4</sub>                                    | p-CH <sub>3</sub> OC <sub>6</sub> H <sub>4</sub> | C <sub>6</sub> H <sub>5</sub> | 35                         |
|                                                                                     | <b>2p</b>                                          | 2-thienyl                                                                             | o-ClC <sub>6</sub> H <sub>4</sub>                | H                   | 0.75                                                                                 | <b>5f</b>                                                                            | p-CH <sub>3</sub> OC <sub>6</sub> H <sub>4</sub>                                    | p-CH <sub>3</sub> OC <sub>6</sub> H <sub>4</sub>                                    | p-CH <sub>3</sub> OC <sub>6</sub> H <sub>4</sub> | 40                            |                            |
|                                                                                     | <b>2q</b>                                          | ( <i>S</i> )-2-pyrrolidine                                                            | C <sub>6</sub> H <sub>5</sub>                    | H                   | >50                                                                                  |  | <b>Spacer</b>                                                                       |                                                                                     | <b>R1</b>                                        | $K_d$                         |                            |
|                                                                                     | <b>2r</b>                                          | ( <i>R</i> )-2-pyrrolidine                                                            | C <sub>6</sub> H <sub>5</sub>                    | H                   | >50                                                                                  |                                                                                      | <b>8a</b>                                                                           | -CH <sub>2</sub> CH <sub>2</sub> -                                                  | H                                                | >50                           |                            |
| <b>2s</b>                                                                           | 4-pyridyl                                          | C <sub>6</sub> H <sub>5</sub>                                                         | H                                                | >50                 | <b>8b</b>                                                                            |                                                                                      | -CH <sub>2</sub> CH <sub>2</sub> CH <sub>2</sub> -                                  | H                                                                                   | >50                                              |                               |                            |
|  |                                                    | <b>R1</b>                                                                             | <b>R2</b>                                        | $K_d$               | <b>8c</b>                                                                            |                                                                                      | -CH <sub>2</sub> C <sub>4</sub> H <sub>6</sub> CH <sub>2</sub> -                    | H                                                                                   | >50                                              |                               |                            |
|                                                                                     | <b>3b</b>                                          | NH <sub>2</sub>                                                                       | o-F                                              | 2                   | <b>8d</b>                                                                            |                                                                                      | -CH <sub>2</sub> CH <sub>2</sub> -                                                  | Cl                                                                                  | 30                                               |                               |                            |
|                                                                                     | <b>3c</b>                                          | NH <sub>2</sub>                                                                       | p-F                                              | 5                   | <b>8e</b>                                                                            |                                                                                      | -CH <sub>2</sub> CH <sub>2</sub> CH <sub>2</sub> -                                  | Cl                                                                                  | 32                                               |                               |                            |
|                                                                                     | <b>3d</b>                                          | NH <sub>2</sub>                                                                       | o-CF <sub>3</sub>                                | 2.5                 | <b>8f</b>                                                                            |                                                                                      |                                                                                     | >50                                                                                 |                                                  |                               |                            |
|                                                                                     | <b>3f</b>                                          | NH <sub>2</sub> COCH <sub>3</sub>                                                     | o-F                                              | 1.2                 |  |                                                                                      |                                                                                     |                                                                                     |                                                  |                               |                            |
|                                                                                     | <b>3g</b>                                          | NH <sub>2</sub> COCH <sub>3</sub>                                                     | o-CF <sub>3</sub>                                | 1.5                 |                                                                                      |                                                                                      |                                                                                     |                                                                                     |                                                  |                               |                            |
|                                                                                     | <b>3i</b>                                          | NH <sub>2</sub> CONH <sub>2</sub>                                                     | o-F                                              | 5                   |                                                                                      |                                                                                      |                                                                                     |                                                                                     |                                                  |                               |                            |
|                                                                                     | <b>3j</b>                                          | NH <sub>2</sub> CONH <sub>2</sub>                                                     | p-F                                              | 10                  |                                                                                      |                                                                                      |                                                                                     |                                                                                     |                                                  |                               |                            |
|                                                                                     | <b>3k</b>                                          | NH <sub>2</sub> CONH <sub>2</sub>                                                     | p-Cl                                             | 15                  |                                                                                      |                                                                                      |                                                                                     |                                                                                     |                                                  |                               |                            |
|                                                                                     | <b>3l</b>                                          | NH <sub>2</sub> CONH <sub>2</sub>                                                     | H                                                | 8                   |                                                                                      |                                                                                      |                                                                                     |                                                                                     |                                                  |                               |                            |
| <b>3n</b>                                                                           | CH(COOC <sub>2</sub> H <sub>5</sub> ) <sub>2</sub> | H                                                                                     | 4                                                |                     |                                                                                      |                                                                                      |                                                                                     |                                                                                     |                                                  |                               |                            |
| <b>3o</b>                                                                           | CH <sub>2</sub> COOH                               | H                                                                                     | 25                                               |                     |                                                                                      |                                                                                      |                                                                                     |                                                                                     |                                                  |                               |                            |
